1 **TITLE:** Expedited gene delivery for osteochondral defect repair in a rabbit knee model: a one-  
2 year investigation

3 **AUTHORS:**

4 Christopher V. Nagelli<sup>1,2</sup>

5 Rodolfo E. De La Vega<sup>1,2,6</sup>

6 Michael Coenen<sup>1,2</sup>

7 Consuelo Padilla de Lopez<sup>1,2</sup>

8 Joseph A. Panos<sup>1,2,3,4</sup>

9 Alejandro Tovar<sup>1</sup>

10 Sebastian A. Müller<sup>1,2,5</sup>

11 Christopher H. Evans<sup>1,2</sup>

12 **AFFILIATIONS:**

13 1. Musculoskeletal Gene Therapy Laboratory, Department of Physical Medicine and  
14 Rehabilitation, Mayo Clinic, Rochester, MN

15 2. Rehabilitation Medicine Center, Department of Physical Medicine and Rehabilitation,  
16 Mayo Clinic, Rochester, MN

17 3. Alix College of Medicine, Mayo Clinic, Rochester, MN

18 4. Department of Physiology and Biomedical Engineering, Mayo Clinic, Rochester, MN

19 5. Department of Orthopedic Surgery, Kantonsspital Baselland, University of Basel, Basel,  
20 Switzerland

21 6. Department cBITE, MERLN Institute, Maastricht University, Maastricht, The Netherlands

22 **CORRESPONDING AUTHOR:**

23 Christopher H. Evans, PhD

24 Mayo Clinic

25 200, First Street SW, Rochester, MN 55905

26 [evans.christopher@mayo.edu](mailto:evans.christopher@mayo.edu)

27 **RUNNING TITLE:** Gene delivery for osteochondral repair

28 **ABSTRACT**

29 **Objective:** To evaluate a single-step, gene-based procedure for repairing osteochondral  
30 lesions.

31 **Design:** Osteochondral lesions were created in the patellar groove of skeletally mature rabbits.  
32 Autologous bone marrow aspirates were mixed with adenovirus vectors carrying cDNA  
33 encoding green fluorescent protein (Ad.GFP) or transforming growth factor- $\beta_1$  (Ad.TGF- $\beta_1$ ) and  
34 allowed to clot. The clotted marrow was press-fit into the defects. Animals receiving Ad.GFP  
35 were euthanized at 2 weeks and intra-articular expression of GFP examined by fluorescence  
36 microscopy. Animals receiving Ad.TGF- $\beta_1$  were euthanized at 3 months and 12 months; repair  
37 was compared to empty defects using histology and immunohistochemistry. Complementary in  
38 vitro experiments assessed transgene expression and chondrogenesis in marrow clots and  
39 fibrin gels. In a subsequent pilot study, repair at 3 months using a fibrin gel to encapsulate  
40 Ad.TGF- $\beta_1$  was evaluated.

41 **Results:** At 2 weeks, GFP expression was seen at variable levels within the cartilaginous  
42 lesion. At 3 months, there was a statistically significant improvement in healing of lesions  
43 receiving Ad.TGF- $\beta_1$ , although variability was high. At 12 months, there was no difference  
44 between the empty defects and those receiving Ad.TGF- $\beta_1$  in overall score and cartilage score,  
45 but the bone healing score remained higher. Variability was again high. In vitro experiments  
46 suggested that variability reflected variable transduction efficiency and chondrogenic activity of  
47 the marrow clots; using fibrin gels instead of marrow provided more uniformity in healing.

48 **Conclusions:** This approach to improving the repair of osteochondral lesions holds promise but  
49 needs further refinement to reduce variability and provide a more robust outcome.

50 **Key Words:** Gene delivery, cartilage repair, osteochondral defects, knee, rabbit, long-term

51

## 52 INTRODUCTION

53 Trauma to articular cartilage is found in 60% of knee arthroscopies.<sup>1</sup> A majority of lesions  
54 include injuries to both the cartilage and subchondral bone (osteochondral defects).<sup>1</sup> These  
55 defects do not heal spontaneously and, if left untreated, can cause pain and dysfunction  
56 leading to post-traumatic osteoarthritis. Cartilage has no innate ability to repair, because the  
57 tissue is avascular, aneural, alymphatic, and does not contain stem or progenitor cells.<sup>2</sup> This  
58 has led to cartilage repair surgery being the current clinical standard of care for patients with  
59 chondral lesions; surgeons perform approximately 500,000 cartilage repair procedures annually  
60 in the US.<sup>3</sup>

61 Autologous chondrocyte implantation (ACI) and microfracture are two popular cell-based  
62 therapies used by surgeons to treat chondral lesions. ACI has shown great promise as a  
63 cartilage repair procedure. However, this is a two-step procedure which involves harvesting  
64 cartilage from the periphery of the joint, expanding the isolated chondrocytes in culture, and  
65 transplanting these cells back into the defect to regenerate tissue.<sup>4</sup> This increases the cost of  
66 the procedure, and patients incur a prolonged post-operative rehabilitation period during which  
67 full weight bearing is delayed.<sup>5 6</sup> In contrast, microfracture is a one-step, point of care procedure  
68 which involves exposing and penetrating the subchondral plate underneath the cartilage defect  
69 to allow bone marrow to enter and form a fibrin clot within the lesion.<sup>7</sup> The coagulated bone  
70 marrow contains mesenchymal stromal cells (MSCs) with the potential to differentiate into  
71 chondrocytes which initiate the repair process.<sup>7</sup> Microfracture has demonstrated promising  
72 short-to-medium term relief for many patients allowing them back to previous levels of activity.<sup>8</sup>  
73 However, according to multiple long-term reports both ACI and microfracture have high failure  
74 rates and patients are likely to develop repair tissue resembling a fibrocartilaginous scar instead  
75 of native articular cartilage.<sup>9-11 12-14</sup> Fibrocartilage has inferior biomechanical properties and does  
76 not endure the joint environment. Its deterioration causes pain, dysfunction, and eventual failure  
77 of the repair, requiring salvage surgery.

78           The present study is based on the hypothesis that the long-term clinical outcome of  
79 microfracture and related marrow stimulation techniques would be improved if the MSCs  
80 differentiated fully into articular chondrocytes instead of fibrochondrocytes. Morphogens, such  
81 as TGF- $\beta_1$ , hold promise in this respect but they are difficult to deliver to osteochondral lesions  
82 in a sustained fashion. Gene transfer offers a technology for overcoming this barrier, and we  
83 have shown that MSCs transduced with adenovirus vectors encoding TGF- $\beta_1$  undergo efficient  
84 chondrogenesis.<sup>15, 16</sup> Based upon these considerations, the research described in this paper  
85 investigates a gene therapy approach for osteochondral defect repair.

86           We have developed a technology in which autologous bone marrow coagulates  
87 incorporating adenoviral vectors are used for gene transfer to osteochondral defects.<sup>17</sup> The  
88 MSCs within the coagulate are transduced by the adenovirus, and the fibrin scaffold retains  
89 additional vector for transducing MSCs as they enter the lesion. The marrow clot also has  
90 excellent handling properties and conforms to the dimensions of the structure within which it  
91 clots. Sieker et al<sup>18</sup> have published promising results using the marrow clot technology in  
92 conjunction with adenovirus encoding bone morphogenetic protein 2 (BMP-2) and Indian  
93 hedgehog (IHH) transgenes. While successful in the short term, defects receiving BMP-2  
94 progressively formed bone, while the cartilage in those receiving Indian hedgehog was  
95 immature and the subchondral bone absent.

96           In the present study, we investigated whether delivering adenoviral vectors carrying  
97 TGF- $\beta_1$  cDNA (Ad.TGF- $\beta_1$ ) using autologous bone marrow coagulates can improve the repair of  
98 osteochondral defects in the rabbit knee at early (3 months) and late (12 months) time points.

99

100

101

## 102 **METHODS**

### 103 *Study Design*

#### 104 *In vivo experiments*

105 Osteochondral defects were surgically created in the knees of skeletally mature New  
106 Zealand White Rabbits. Depending on the experiment, the defects were left untreated (empty  
107 defects, controls) or filled with clotted bone marrow, clotted bone marrow containing Ad.TGF- $\beta_1$   
108 (BMC+ Ad.TGF- $\beta_1$ ) or adenovirus carrying the enhanced green fluorescent protein (GFP) cDNA  
109 (BMC+Ad.GFP), fibrin hydrogel or fibrin hydrogel containing Ad.TGF- $\beta_1$ .

110 Rabbits receiving Ad.GFP were euthanized after two weeks. Synovium, adjacent  
111 cartilage, and tissue from within the osteochondral defect was harvested and transgene  
112 expression verified by fluorescence microscopy. Groups of rabbits receiving Ad.TGF- $\beta_1$  were  
113 euthanized after 3 months and 12 months. The distal femurs were stained with safranin orange-  
114 fast green and repair of the osteochondral defects assessed in a blinded fashion by four  
115 individuals using a modified O'Driscoll score. Sections at 12 months were further stained for  
116 type I and type II collagen by immunohistochemistry.

#### 117 *In vitro experiments*

118 Bone marrow was aspirated from the iliac crests of rabbits and aliquots distributed  
119 among wells in a 96-well plate. Saline or Ad.TGF- $\beta_1$  were added and mixed with the marrow,  
120 which was then allowed to clot. The marrow clots were cultured in well plates for 15 days.  
121 Conditioned media were assayed for TGF- $\beta_1$  expression by ELISA. After 28 days the clots were  
122 examined by histology for evidence of chondrogenesis.

123 Fibrin gels were formed in 96-well plates. Saline, Ad.TGF- $\beta_1$  or Ad.GFP were  
124 incorporated into the gel as it formed. Gels were then co-cultured with human MSCs in growth

125 medium. Two days later media were changed to either complete chondrogenic medium or  
126 incomplete chondrogenic medium. Transgene expression was assessed by immunofluorescent  
127 identification of GFP+ cells and by ELISA measurement of TGF- $\beta_1$  in conditioned media.

#### 128 *Adenovirus vector preparation*

129 First generation adenovirus vectors, serotype 5, carrying TGF- $\beta_1$  (Ad.TGF- $\beta_1$ ) or GFP  
130 (Ad.GFP) cDNA under the transcriptional control of the CMV promoter were produced in 293  
131 cells as previously described.<sup>19</sup> Cell lysates were purified by density gradient ultracentrifugation  
132 and dialyzed against 10 mM Tris-HCl, pH 7.8, 150 mM NaCl, 10 mM MgCl<sub>2</sub> and 4% sucrose.  
133 Aliquots were stored at -80°. Titer was estimated as  $4 \times 10^{12}$  viral particles (vp) ml<sup>-1</sup> by OD 260.

#### 134 *Marrow clots*

135 Bone marrow (2 ml) was aspirated from the iliac crest of an anesthetized rabbit using a  
136 16-gauge needle. This was distributed in 250  $\mu$ l aliquots among wells in a 96-well plate. After  
137 adding 25  $\mu$ l saline or adenovirus suspension ( $10^9$  vp) the marrow was titrated and then allowed  
138 to clot for 20 min, by which time the clot was firm enough to enable handling (figure 1).

139 Implantation of bone marrow clots (BMC) into osteochondral defects is described in the  
140 section on rabbit surgery. For *in vitro* experiments, BMCs were transferred to Ultra Low-  
141 Attachment 24-well plates (Corning, Corning, NY) and cultured in 1 ml incomplete chondrogenic  
142 medium (DMEM-HG, 10% FBS, 100 nm dexamethasone, and 1% penicillin/streptomycin) for 28  
143 days with change of medium every 2 or 3 days. The TGF- $\beta_1$  concentration in the conditioned  
144 medium was measured by ELISA (R&D Systems, Minneapolis, MN). At day 28 samples were  
145 processed for histology using safranin orange and fast green staining.

146

147

148 *Fibrin hydrogels*

149 Fibrin hydrogels were formed in 96-well plates using Tisseel fibrin glue kit (Baxter  
150 Healthcare Corporation, Deerfield, IL). The following ingredients were added in order: 125  $\mu$ l  
151 PBS, 25  $\mu$ l Ad.GFP or Ad.TGF- $\beta_1$  ( $10^9$  vp) or PBS, 50  $\mu$ l thrombin, 150  $\mu$ l fibrinogen. After 15-  
152 20 min at room temperature the polymerized gels were sliced into 4 individual discs and placed  
153 in wells on a 96-well plate. To each well were added 250,000 human MSCs (P3-P5, Lonza Ltd.,  
154 Basel, Switzerland) and incubation continued at 37°C, 5% CO<sub>2</sub> for 2 days. At this time media  
155 were changed to incomplete chondrogenic medium and incubated for a further 16 days, with  
156 medium change every 2 days. The TGF- $\beta_1$  concentrations of the media were measured by  
157 ELISA and GFP expression observed by fluorescence microscopy. Samples were processed for  
158 histology using safranin orange - fast green staining.

159 *Osteochondral defect surgery*

160 A total of 15 (n=30 total knees) skeletally mature male New Zealand white rabbits  
161 (average weight: 3.54 $\pm$ 0.29 kg; average age:9.1 $\pm$ 0.6 months) were injected with ketamine (35  
162 mg/kg) and xylazine (5 mg/kg) intra-muscularly and given buprenorphine (0.18 mg/kg) for pre-  
163 emptive analgesia. Both hindlimbs and the lumbar region were shaved and the skin sterilized.  
164 Rabbits were then intubated with a size 2.5 – 3.5 endotracheal tube and maintained on oxygen  
165 and 2-2.5% isoflurane during surgery.

166 If bone marrow aspirates were required, rabbits were placed in the prone position in a  
167 sterile field exposing the lumbar region and a 1 cm incision was made exposing the posterior  
168 iliac crest after soft tissue dissection. The iliac crest was penetrated with a bone marrow biopsy  
169 needle and the bone was used to aspirate marrow was aspirated from the iliac crest. After the  
170 skin closure was closed, rabbits were turned to a supine position in order to create bilateral  
171 osteochondral defects within the patellar groove. After disinfection and draping, a 3-cm medial

172 anterior parapatellar incision was made, and the knee joint accessed by opening the joint  
173 capsule medial to the patella. The knee was extended and the patella dislocated laterally giving  
174 access to the patellar groove. The knee was then flexed and a full-thickness osteochondral  
175 defect (3.2 mm diameter x 5-8 mm deep) created within the patellar groove with continuous  
176 irrigation. After the defect was created, the surgeon checked to verify that the defect did not  
177 perforate the metaphysis or extend into the medullary canal. Where necessary, marrow clots or  
178 fibrin hydrogels were press-fit into the defects, the patella relocated, and the joint capsule and  
179 skin closed using 3-0 and 4-0 resorbable sutures, respectively. A summary of the surgical  
180 procedure is shown in figure 1.

### 181 *Histology*

182 Rabbit condyles were fixed in 10% neutral buffered formalin for 15 days and decalcified  
183 in unbuffered 10% EDTA pH 7.4 (Mol-decalcifier, Milestone Medical, Kalamazoo, MI) with  
184 constant stirring at 37° using a decalcifying microwave apparatus (KOS Histostation. Milestone  
185 Medical). Decalcification was evaluated using a digital x-ray cabinet (MX-20, Faxitron Bioptics,  
186 Tucson, AZ). Fixed and decalcified specimens were dehydrated through graded alcohols,  
187 embedded in paraffin; 5 µm sections were cut using an automatic microtome (HM 355S,  
188 Thermo Scientific Kalamazoo, MI) and mounted onto positively charged slides (Superfrost Plus  
189 Microscope Slides, Fisher Scientific, Pittsburgh, PA). Safranin orange – fast green staining was  
190 performed according to standard protocols.

191 Histological scoring of the sections by 4 blinded investigators (CVN, CHE, RDLV, MC)  
192 using the modified O'Driscoll scoring scale. An unpaired, student's t-test was performed to  
193 determine statistical significance ( $p < 0.05$ ).

194

195

196



197 *Dual Immunohistochemistry*

198 Expression of collagen type I and collagen type II was examined by double staining.  
199 Briefly, formalin-fixed tissue sections (5µm-thick) were deparaffinized in xylene and rehydrated  
200 in an ethanol/water gradient series, then rinsed in phosphate-buffered saline/0.05% Tween-20  
201 (PBS-T) (Sigma; St. Louis, MO). Endogenous peroxidase activity was blocked with 3%  
202 hydrogen peroxide for 10 min, followed by treatment with 0.1% hyaluronidase with 0.1%  
203 pronase in tris-buffered saline (all from Sigma) in a water bath for 30 min at 37 °C to unmask  
204 collagen antigens. Slide sections were washed 3 times in PBS-T for 5 min each. Endogenous  
205 biotin activity was blocked by incubating the slides with the avidin and biotin solutions (SP-2001,  
206 Vector Laboratories), then washed 3 times in PBS-T for 5 min each. Nonspecific binding was  
207 blocked with animal-free blocker (SP-5035; Vector Laboratories, Burlingame, California) for 30  
208 min at room temperature). Slides were incubated with goat polyclonal anti-type I collagen  
209 antibody (dilution 1:250), (Cat No. 1310-01, Southern Biotech, Birmingham, AL) for 1 hour at  
210 room temperature (RT). Then, the slides were washed 3 times in PBS-T for 5 min each,  
211 followed by incubation with biotinylated rabbit anti-goat IgG antibody (PK-6105; Vector  
212 laboratories) for 30 min at RT, washed, and incubated with the avidin-biotin-peroxidase complex  
213 solution (PK-6105; Vector laboratories) for a further 30 min at RT.

214 Collagen type I staining was developed with DAB (3,3'-diaminobenzidine) (SK-4103,  
215 Vector Laboratories), a horseradish peroxidase (HRP) substrate that yields a brown product.  
216 DAB-slides slides were washed; and subsequently incubated with the second primary antibody,  
217 a mouse monoclonal to collagen II (dilution 1:200) (Cat No. 11-116B3, Developmental Studies  
218 Hybridoma bank, University of Iowa) in a humidified chamber at 4 °C overnight. The next day,  
219 slides were washed 3 times in PBS-T for 5 min each and incubated with the biotinylated horse  
220 anti-mouse IgG antibody (AK-5002, Vector laboratories) for 30 min, washed, and then treated  
221 with avidin-biotin-alkaline phosphatase complex solution (AK-5002, Vector laboratories) for 30  
222 min at RT. Collagen type II staining was developed with red alkaline phosphatase substrate

223 (SK-5105, Vector Laboratories) that yields a magenta precipitate. Nuclei were counterstained  
224 with hematoxylin (H-3404-100, Vector Laboratories), then quickly dehydrated in a graded ethyl  
225 alcohol series, cleared with xylene, and mounted with xylene-based mounting medium. To verify  
226 specificity of the immunolabeling, isotype controls consisting of goat IgG polyclonal (1:250) and  
227 mouse IgG1 kappa (1:200) isotype were included in a set of sections.

228

## 229 **RESULTS**

### 230 *Gene delivery using bone marrow clots for in vivo osteochondral defect repair*

231 After two-weeks, the BMC+Ad.GFP group (n=3 rabbits; n=6 knees) was euthanized and  
232 both knees were harvested from each rabbit (figure 2A). The tissue within the defect was  
233 removed using sterile forceps and placed into a well of an ultra low-binding, 24-well plate filled  
234 with culture media. Fluorescence microscopy was used to detect transgene expression within  
235 the tissue. We found GFP expression within the harvested tissue from all 6 knees, although to  
236 variable degrees (figure 2B), confirming gene delivery with transgene expression for at least two  
237 weeks after surgery. There was no GFP activity in the cartilage surrounding the defect, and  
238 there was negligible expression in the synovium (not shown).

239 Clots containing Ad.TGF- $\beta_1$  were implanted into osteochondral defects in the patellar  
240 grooves of rabbit knees, with euthanasia at 3 and 12 months after surgery. Both femurs were  
241 harvested from each rabbit and processed for histological and immunohistochemistry analysis.  
242 Sections through defects in the left and right knees for each rabbit, stained with safranin orange  
243 – fast green at 3- and 12-months are shown in figure 3A and figure 4A, respectively. Using a  
244 modified O'Driscoll score we found that, despite considerable variability within groups, defects  
245 receiving BMC+Ad.TGF- $\beta_1$  had scores that were statistically higher than empty controls at 3  
246 months (figure 3B). These included the overall score, the cartilage component of the score and  
247 the osseous component of the score.

248            However, the differences for overall and cartilage scores disappeared by 12-months  
249 after surgery (figure 4B). In all groups there was a decline in overall and cartilage scores by 12-  
250 months ( $p < 0.01$ ) such that intergroup differences were no longer apparent. Nevertheless, the  
251 bone score continued to improve in the group receiving BMC+Ad.TGF- $\beta_1$  thereby enhancing the  
252 statistical significance of the difference (figure 4B).

253            We also performed dual immunohistochemical staining for collagen type I and type II  
254 within the repair tissue of the same groups at 12 months (figure 4C). We found uniform strong  
255 staining for collagen-type II within the repair tissue of the BMC+Ad.TGF- $\beta_1$  group, whereas the  
256 empty defects stained only weakly for type II collagen.

257

#### 258 *Chondrogenic differentiation of bone marrow clots with Ad.TGF- $\beta_1$*

259            Because of the high variability seen in the healing of the Ad.TGF- $\beta_1$  group, we performed  
260 a follow-up experiment in which marrow clots were formed with or without Ad.TGF- $\beta_1$  and  
261 maintained in culture for 28 days with incomplete chondrogenic medium. During this period, the  
262 secretion of TGF- $\beta_1$  was measured by ELISA of conditioned media. After 28 days, clots were  
263 prepared for histology with safranin orange-fast green staining. Unmodified, control clots  
264 secreted little TGF- $\beta_1$  and did not show any evidence of chondrogenesis (figure 5A, C). Only  
265 one of the three clots containing Ad.TGF- $\beta_1$  secreted markedly elevated TGF- $\beta_1$  and had  
266 regions of chondrogenesis under histological examination (figure 5B, C).

267

#### 268 *Chondrogenic differentiation of MSCs using fibrin scaffolds incorporating Ad.TGF- $\beta_1$*

269            Much of the variability shown in figures 2-6 may reflect variation in the quality of the  
270 bone marrow aspirated from the iliac crests of the rabbits. As a more uniform and reliable  
271 alternative to bone marrow, we investigated the use of commercially available fibrin.

272 Human MSCs were co-cultured with a fibrin hydrogel incorporating adenoviral vectors  
273 encoding GFP (Ad.GFP). As shown in figure 6A, we observed MSC migration into the scaffold  
274 with transduction and expression of GFP after only 2 days of co-culture. When the fibrin  
275 hydrogels contained Ad.TGF- $\beta_1$ , expression of TGF- $\beta_1$  was very high, exceeding 180 ng/mL at  
276 its maximum on day 6. Control groups produced a basal level of approximately 4 ng/mL TGF- $\beta_1$   
277 (figure 6B).

278

### 279 *Gene delivery using fibrin scaffolds for in vivo osteochondral defect repair*

280 With the encouraging *in vitro* data shown in figure 6, a small pilot study explored the use  
281 of the fibrin+Ad.TGF- $\beta_1$  scaffold to repair osteochondral defects. Three osteochondral defects  
282 received the fibrin+Ad.TGF- $\beta_1$  construct, and one received fibrin alone. After 3-months, the  
283 femurs were harvested and processed for histology and immunohistochemistry for collagen type  
284 II.

285 Sections through the middle of the repair tissue were stained with safranin orange- fast  
286 green are shown in Figure 7A. The control defect which received the empty fibrin scaffold  
287 demonstrated very poor healing. Defects which received the fibrin+Ad.TGF- $\beta_1$  scaffolds had  
288 repair tissue that was rich in proteoglycan and resembled articular cartilage; with one exception,  
289 was continuous with the surrounding native tissue.

290 We also performed immunohistochemistry for collagen-type II for these knees (Figure  
291 7B). We found strong staining for collagen type II in defects receiving the fibrin+Ad.TGF- $\beta_1$   
292 scaffold whereas defects receiving the control fibrin scaffold had less staining for type II  
293 collagen.

294

295

296 **DISCUSSION**

297 Gene transfer offers to enhance the regenerative behavior of musculoskeletal tissues,<sup>20</sup>  
298 including cartilage<sup>21</sup> while single-step procedures that can be delivered at point-of-care will  
299 facilitate clinical translation and utilization.<sup>22</sup> In the context of cartilage repair, previous research  
300 has confirmed that bone marrow clots with embedded adenovirus vectors can deliver  
301 transgenes to osteochondral defects, leading to transgene expression within the lesion.<sup>17</sup>  
302 Consistent with this, Sieker et al.<sup>18</sup> used bone marrow coagulates with adenoviral vectors  
303 encoding BMP-2 and IHH in a rabbit osteochondral defect model. Expression of BMP-2 gave  
304 encouraging early repair but led to the formation of osteophytes and elevated subchondral bone  
305 after 13 weeks.<sup>18</sup> IHH, in contrast, generated an abundance of immature, highly cellular  
306 cartilage that did not remodel into mature articular cartilage during the 13 week experiment.<sup>18</sup>  
307 Ivkovic et al.<sup>23</sup> also used BMC to deliver TGF- $\beta$ 1 cDNA in a sheep chondral defect model.  
308 Although areas of the defect showed *de novo* cartilage formation by 6 months complete repair  
309 was not achieved, possibly because there was no connection to the underlying bone marrow.

310 In the present experiments, healing of osteochondral defects in the patellar groove of the  
311 rabbit knee proved highly variable, both in empty defects and in defects receiving bone marrow  
312 clots incorporating Ad.TGF- $\beta$ 1. There are several sources of variability. Because the surgeries  
313 were conducted under closely controlled conditions, variability in the healing of empty defects  
314 presumably reflects biological variability between individual New Zealand white rabbits which,  
315 although inbred, are not syngeneic. Such intrinsic biological variability would have been  
316 compounded in defects receiving Ad.TGF- $\beta$ 1 by the heterogeneous nature of bone marrow  
317 aliquots. This is best illustrated in figure 6, showing that only 1 in 3 marrow clots incorporating  
318 Ad.TGF- $\beta$ 1 secreted TGF- $\beta$ 1 and contained areas of chondrogenesis. This may be attributable  
319 to increasing dilution of the marrow by blood as aspiration continues. Nevertheless it is

320 encouraging that, despite this background variability, a statistically significant improvement in  
321 healing was evident at 3 months.

322 It appears that the variability in the quality of different marrow aspirates can be obviated  
323 by the use of a fibrin gel where, under in vitro conditions, the production of TGF- $\beta_1$  by human  
324 MSCs was high and uniform. Although a fibrin scaffold lacks the chondroprogenitor cells of  
325 marrow, the number of such cells in a 250  $\mu$ l aliquot of marrow is likely to be small and an  
326 acceptable compromise in using the fibrin scaffolds to ensure greater uniformity in gene  
327 delivery. Moreover, by eliminating the need to harvest marrow, the use of fibrin eliminates one  
328 procedure. The small exploratory experiment using fibrin gels in conjunction with Ad.TGF-  
329  $\beta_1$  provided encouraging results that merit further development of this technology. The  
330 alternative approach of administering vector directly to the marrow as it enters the lesion from  
331 the underlying marrow is also showing promising results in animal models.<sup>24, 25</sup>

332 The overall O'Driscoll score and that of the cartilage component fell between 3 and 12  
333 months. This is reminiscent of the study by Shapiro et al<sup>26</sup> who noted a similar trend in the  
334 spontaneous healing of osteochondral defects in young rabbits. Thus, although transfer of TGF-  
335  $\beta_1$  accelerated and improved early healing, it could not overcome the subsequent delayed  
336 decline noted in this model. Addressing this problem will be a matter for future research.

### 337 **ACKNOWLEDGEMENTS**

338 The authors would like to thank the support of the Department of Comparative Medicine at  
339 Mayo Clinic for their support for excellent animal care and communication.

### 340 **CONTRIBUTIONS**

341 All authors have made substantial contributions to the study and approved the final submitted  
342 manuscript. Nagelli (nagelli.christopher@mayo.edu) and Evans (evans.christopher@mayo.edu)  
343 take full responsibility for the integrity of the research.

344 Nagelli: Collection and assembly of data, analysis and interpretation of the data, drafting of the  
345 article, final approval of the article

346 De la Vega: Collection and assembly of data, analysis and interpretation of the data, technical  
347 support, editing of manuscript

348 Coenen: Collection and assembly of data, analysis and interpretation of the data, technical  
349 support, editing of manuscript

350 De Padilla: Collection and assembly of data, analysis and interpretation of the data, technical  
351 support, editing of manuscript

352 Panos: Collection and assembly of data, analysis and interpretation of the data, technical  
353 support, editing of manuscript

354 Trovar: Collection and assembly of data, technical support

355 Müller: Collection and assembly of data, analysis and interpretation of the data, technical  
356 support, editing of manuscript

357 Evans: Conception and design, collection and assembly of data, analysis and interpretation of  
358 the data, drafting of the article, final approval of the article

359

### 360 ***ROLE OF FUNDING SOURCE***

361

362 Support for CVN was received from the National Institute of Arthritis and Musculoskeletal and

363 Skin Diseases grant T32AR56950. CHE's research is supported, in part, by the John and Posy

364 Krehbiel Professorship in Orthopedics. Funding from the Musculoskeletal Regeneration

365 Partnership Fund by Mary Sue and Michael Shannon is gratefully acknowledged.

### 366 ***CONFLICT OF INTEREST***

367

368 There are no conflicts of interests for the authors for this study.

369

370

### 371 ***REFERENCES***

- 372 1. Widuchowski W, Widuchowski J, Trzaska T. Articular cartilage defects: study of 25,124 knee  
373 arthroscopies. *Knee* 2007; 14: 177-182.
- 374 2. Sophia Fox AJ, Bedi A, Rodeo SA. The basic science of articular cartilage: structure, composition,  
375 and function. *Sports Health* 2009; 1: 461-468.
- 376 3. McCormick F, Harris JD, Abrams GD, Frank R, Gupta A, Hussey K, et al. Trends in the surgical  
377 treatment of articular cartilage lesions in the United States: an analysis of a large private-payer  
378 database over a period of 8 years. *Arthroscopy* 2014; 30: 222-226.
- 379 4. Brittberg M, Lindahl A, Nilsson A, Ohlsson C, Isaksson O, Peterson L. Treatment of deep cartilage  
380 defects in the knee with autologous chondrocyte transplantation. *New England Journal of*  
381 *Medicine* 1994; 331: 889-895.
- 382 5. Mistry H, Connock M, Pink J, Shyangdan D, Clar C, Royle P, et al. Autologous chondrocyte  
383 implantation in the knee: systematic review and economic evaluation. *Health Technol Assess*  
384 *2017; 21: 1-294.*
- 385 6. Nho SJ, Pensak MJ, Seigerman DA, Cole BJ. Rehabilitation after autologous chondrocyte  
386 implantation in athletes. *Clin Sports Med* 2010; 29: 267-282, viii.

- 387 7. Steadman JR, Rodkey WG, Singleton SB, Briggs KK. Microfracture technique for full-thickness  
388 chondral defects: Technique and clinical results. *Operative Techniques in Orthopaedics* 1997; 7:  
389 300-304.
- 390 8. Steadman JR, Briggs KK, Rodrigo JJ, Kocher MS, Gill TJ, Rodkey WG. Outcomes of microfracture  
391 for traumatic chondral defects of the knee: Average 11-year follow-up. *Arthroscopy - Journal of*  
392 *Arthroscopic and Related Surgery* 2003; 19: 477-484.
- 393 9. Knutsen G, Drogset JO, Engebretsen L, Grontvedt T, Ludvigsen TC, Loken S, et al. A Randomized  
394 Multicenter Trial Comparing Autologous Chondrocyte Implantation with Microfracture: Long-  
395 Term Follow-up at 14 to 15 Years. *J Bone Joint Surg Am* 2016; 98: 1332-1339.
- 396 10. Camp CL, Stuart MJ, Krych AJ. Current concepts of articular cartilage restoration techniques in  
397 the knee. *Sports Health* 2014; 6: 265-273.
- 398 11. Ogura T, Bryant T, Minas T. Long-term Outcomes of Autologous Chondrocyte Implantation in  
399 Adolescent Patients. *Am J Sports Med* 2017; 45: 1066-1074.
- 400 12. Nehrer S, Spector M, Minas T. Histologic analysis of tissue after failed cartilage repair  
401 procedures. *Clin Orthop Relat Res* 1999: 149-162.
- 402 13. Mithoefer K, McAdams T, Williams RJ, Kreuz PC, Mandelbaum BR. Clinical efficacy of the  
403 microfracture technique for articular cartilage repair in the knee: an evidence-based systematic  
404 analysis. *Am J Sports Med* 2009; 37: 2053-2063.
- 405 14. Oussedik S, Tsitskaris K, Parker D. Treatment of articular cartilage lesions of the knee by  
406 microfracture or autologous chondrocyte implantation: a systematic review. *Arthroscopy* 2015;  
407 31: 732-744.
- 408 15. Palmer GD, Steinert A, Pascher A, Gouze E, Gouze JN, Betz O, et al. Gene-induced  
409 chondrogenesis of primary mesenchymal stem cells in vitro. *Molecular Therapy* 2005; 12: 219-  
410 228.
- 411 16. Steinert AF, Palmer GD, Pilapil C, Nöth U, Evans CH, Ghivizzani SC. Enhanced in vitro  
412 chondrogenesis of primary mesenchymal stem cells by combined gene transfer. *Tissue*  
413 *Engineering - Part A* 2009; 15: 1127-1139.
- 414 17. Pascher A, Palmer GD, Steinert A, Oligino T, Gouze E, Gouze JN, et al. Gene delivery to cartilage  
415 defects using coagulated bone marrow aspirate. *Gene Therapy* 2004; 11: 133-141.
- 416 18. Sieker JT, Kunz M, Weissenberger M, Gilbert F, Frey S, Rudert M, et al. Direct bone  
417 morphogenetic protein 2 and Indian hedgehog gene transfer for articular cartilage repair using  
418 bone marrow coagulates. *Osteoarthritis Cartilage* 2015; 23: 433-442.
- 419 19. Gouze JN, Stoddart MJ, Gouze E, Palmer GD, Ghivizzani SC, Grodzinsky AJ, et al. In vitro gene  
420 transfer to chondrocytes and synovial fibroblasts by adenoviral vectors. *Methods Mol Med*  
421 2004; 100: 147-164.
- 422 20. Evans CH, Huard J. Gene therapy approaches to regenerating the musculoskeletal system. *Nat*  
423 *Rev Rheumatol* 2015; 11: 234-242.
- 424 21. Evans CH, Ghivizzani SC, Smith P, Shuler FD, Mi Z, Robbins PD. Using gene therapy to protect and  
425 restore cartilage. *Clinical Orthopaedics and Related Research* 2000: S214-S219.
- 426 22. Evans CH, Palmer GD, Pascher A, Porter R, Kwong FN, Gouze E, et al. Facilitated endogenous  
427 repair: Making tissue engineering simple, practical, and economical. *Tissue Engineering* 2007;  
428 13: 1987-1993.
- 429 23. Ivkovic A, Pascher A, Hudetz D, Maticic D, Jelic M, Dickinson S, et al. Articular cartilage repair by  
430 genetically modified bone marrow aspirate in sheep. *Gene Ther* 2010; 17: 779-789.
- 431 24. Cucchiari M, Madry H. Overexpression of human IGF-I via direct rAAV-mediated gene transfer  
432 improves the early repair of articular cartilage defects in vivo. *Gene Ther* 2014; 21: 811-819.



- 433 25. Cucchiarini M, Asen AK, Goebel L, Venkatesan JK, Schmitt G, Zurakowski D, et al. Effects of TGF-  
434 beta Overexpression via rAAV Gene Transfer on the Early Repair Processes in an Osteochondral  
435 Defect Model in Minipigs. *Am J Sports Med* 2018; 46: 1987-1996.  
436 26. Shapiro F, Koide S, Glimcher MJ. Cell origin and differentiation in the repair of full-thickness  
437 defects of articular cartilage. *J Bone Joint Surg Am* 1993; 75: 532-553.

438  
439 *Figure 1:* Summary of surgical procedures. Bone marrow was harvested from the iliac crest of  
440 the New Zealand white rabbits (A) and 250  $\mu$ L aliquots of marrow were dispensed into a 96-well  
441 plate (B); 25  $\mu$ L of Ad.TGF- $\beta$ 1 were added and the mixture titrated. After approximately 15-20  
442 min, the bone marrow aliquots coagulated and formed into a gelatinous plug, which could be  
443 picked up with sterile forceps (B). An osteochondral defect (3.2 mm wide and 5-8 mm deep)  
444 was created in the patellar groove (C) and the bone marrow clot was press-fit into the defect  
445 (D).

446  
447 *Figure 2:* *In vivo* transgene expression. Rabbits in the BMC+Ad.GFP group were sacrificed 2  
448 weeks after surgery and tissue within osteochondral defects (n=3 rabbits; n=6 knees) harvested,  
449 GFP expression was confirmed by fluorescence microscopy (A, B).

450  
451 *Figure 3:* Osteochondral defect repair in empty defect and BMC+Ad.TGF- $\beta$ 1 groups at 3  
452 months. Safranin orange - fast green staining of osteochondral defects was used to assess  
453 healing in each group (A) (n=4 rabbits). Using the modified O'Driscoll score, knees were scored  
454 by four blinded raters who found statistically significant differences in overall scores, cartilage  
455 scores and bone scores between the two groups (B).

456  
457 *Figure 4:* Osteochondral defect repair in the empty defect and BMC+Ad.TGF- $\beta$ 1 groups at 12  
458 months. Safranin orange - fast green staining of osteochondral defects was used to assess  
459 healing in each group (A) (n=6 rabbits; n=6 knees/group). Using the modified O'Driscoll score,  
460 knees were scored by four blinded raters who found no statistically significant differences in  
461 overall scores or cartilage scores, but there a significant difference in bone scores between  
462 treatment groups (B). Dual immunohistochemistry staining for collagen type I and type II of the  
463 osteochondral repair tissue from the empty defect and BMC+Ad.TGF- $\beta$ 1 (B) groups one year  
464 after surgery was also performed.

465  
466 *Figure 5:* *In vitro* chondrogenesis of bone marrow coagulates (BMC) with or without Ad.TGF- $\beta$ 1  
467 incorporation after 15 days. Safranin-orange staining at day 15 of the BMC only (A) found that  
468 none of the clots underwent chondrogenesis while only one of the three clots containing  
469 BMC+Ad.TGF (B) had evidence of chondrogenesis showing the presence of chondrocytes  
470 surrounded by a rich proteoglycan extracellular matrix. The supernatant from each clot was  
471 assayed for TGF- $\beta$ 1 (C); the single clot that underwent chondrogenesis was also the only clot  
472 producing significant amounts of TGF- $\beta$ 1.

473  
474 *Figure 6:* Gene transfer to human MSCs in culture using fibrin scaffolds. MSCs were co-cultured  
475 with a fibrin hydrogel incorporating Ad.GFP. By 2 days of co-culture the MSCs were migrating  
476 into the scaffold, becoming transduced with Ad.GFP, and expressing GFP (A). We also cultured  
477 MSCs with fibrin scaffolds containing Ad.TGF- $\beta$ 1 and found that the expression of TGF- $\beta$ 1 to be  
478 much higher than the control scaffolds lacking Ad.TGF- $\beta$ 1 (B).

479  
480 *Figure 7:* Gene delivery using fibrin scaffolds for *in vivo* osteochondral defect repair. Safranin  
481 orange - fast green staining of histological sections of the osteochondral defects demonstrate  
482 differential healing response between defects containing empty scaffolds and those containing

483 Ad.TGF- $\beta$ 1 (A). Collagen type II staining of the same sections revealed abundant collagen type  
484 II in the repair tissue of the knees which received the fibrin scaffolds with Ad.TGF- $\beta$ 1 (B).

485  
486  
487  
488  
489  
490  
491  
492  
493  
494  
495  
496  
497  
498  
499  
500  
501  
502  
503  
504  
505  
506  
507  
508  
509  
510  
511  
512  
513  
514  
515  
516  
517  
518  
519  
520  
521  
522  
523  
524  
525  
526  
527  
528  
529  
530  
531  
532  
533

534 **Figure 1**  
535

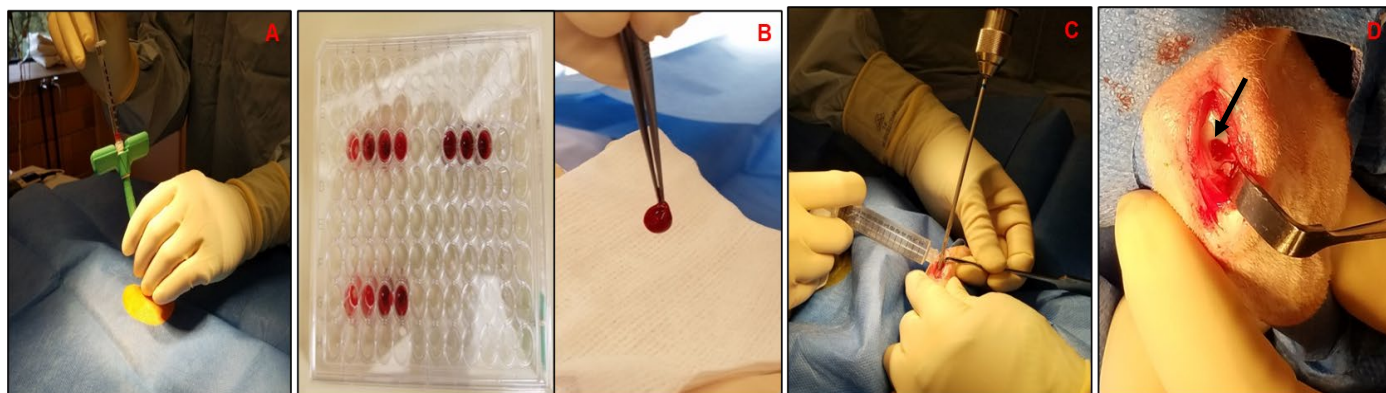

Harvesting bone marrow → Bone marrow aliquots and formation of bone marrow clot with Ad.TGF- $\beta$ 1 → Creating osteochondral defect in femoral groove → Bone marrow clot in defect

536  
537  
538  
539  
540  
541  
542  
543  
544  
545  
546  
547  
548  
549  
550  
551  
552  
553  
554  
555  
556  
557  
558  
559  
560  
561  
562  
563  
564  
565  
566  
567  
568  
569  
570  
571

572 **Figure 2**  
573

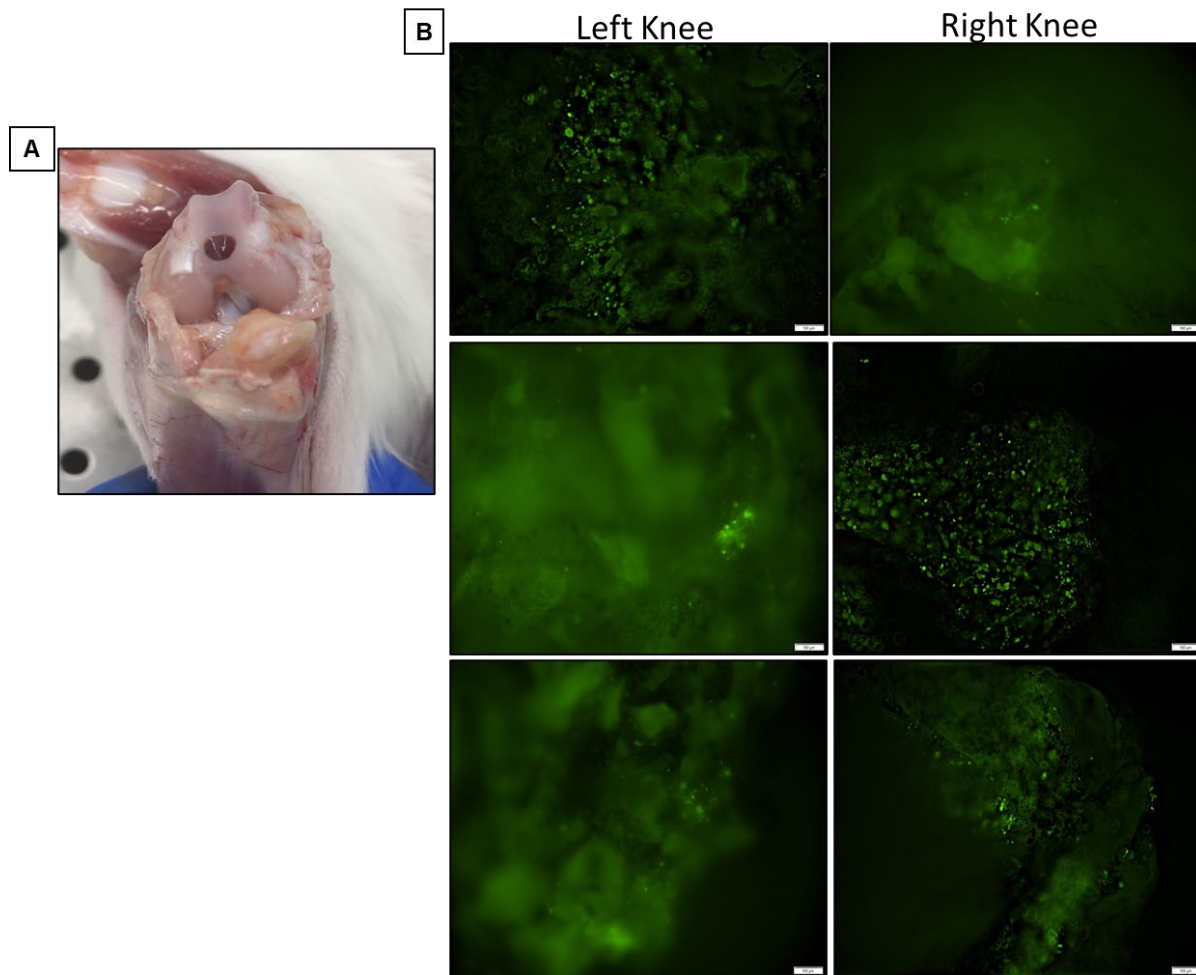

574  
575

576 **Figure 3**

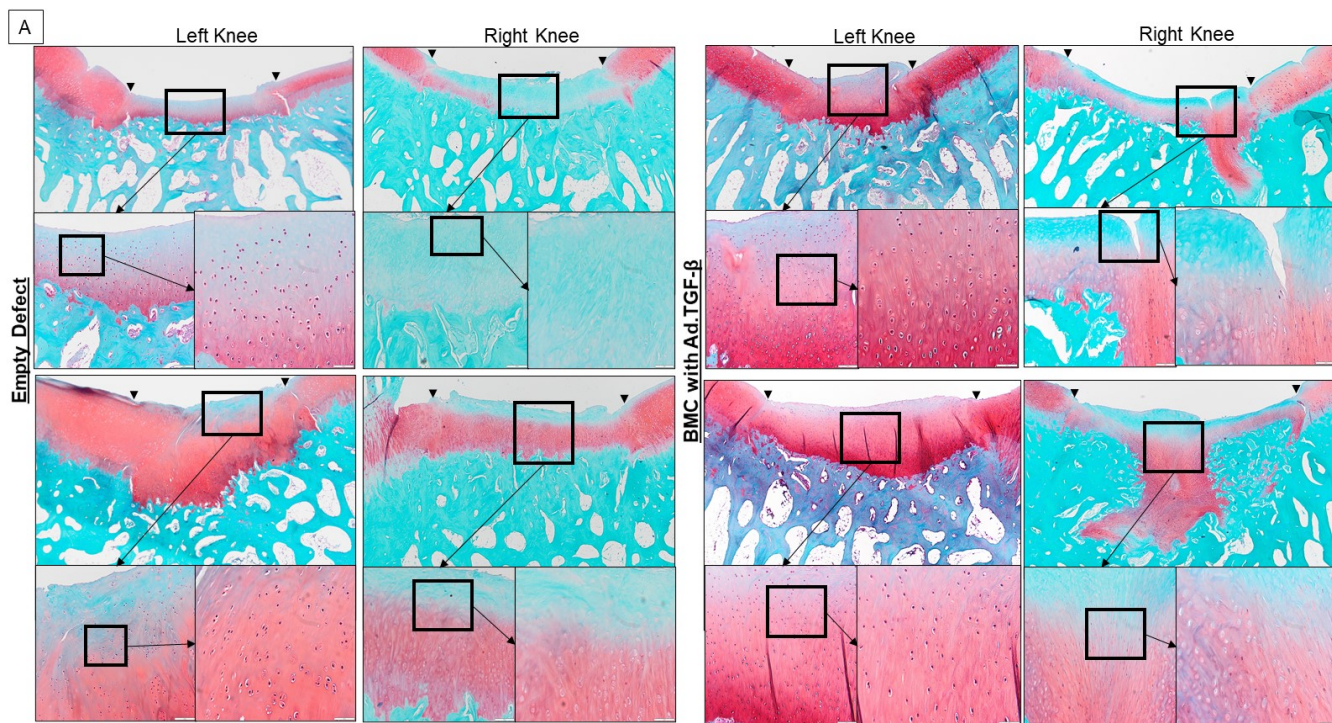

577  
578  
579  
580  
581  
582  
583  
584  
585  
586  
587  
588  
589  
590  
591  
592  
593  
594  
595  
596  
597  
598  
599  
600  
601  
602  
603  
604

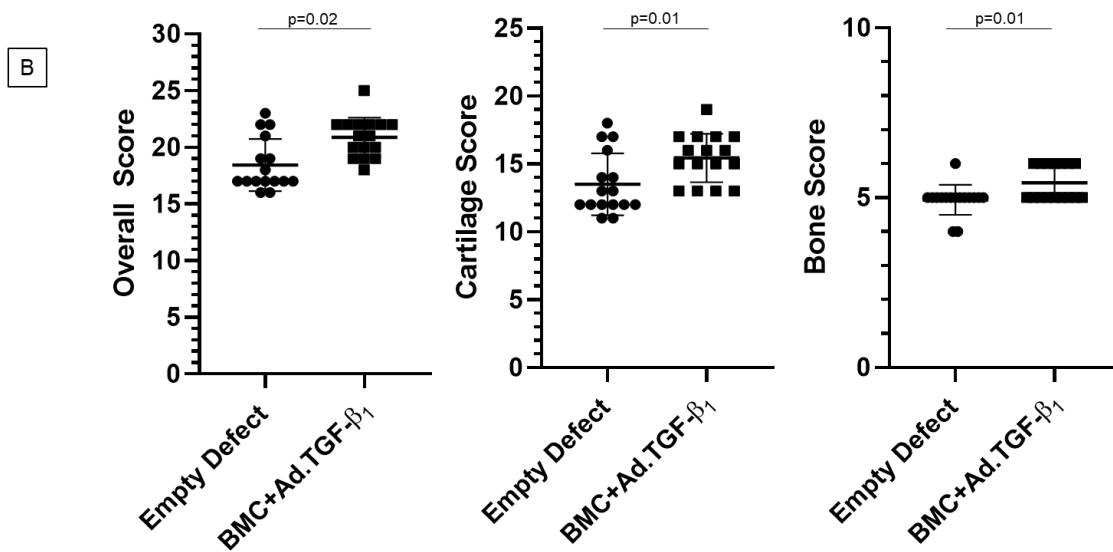

605

**Figure 4**

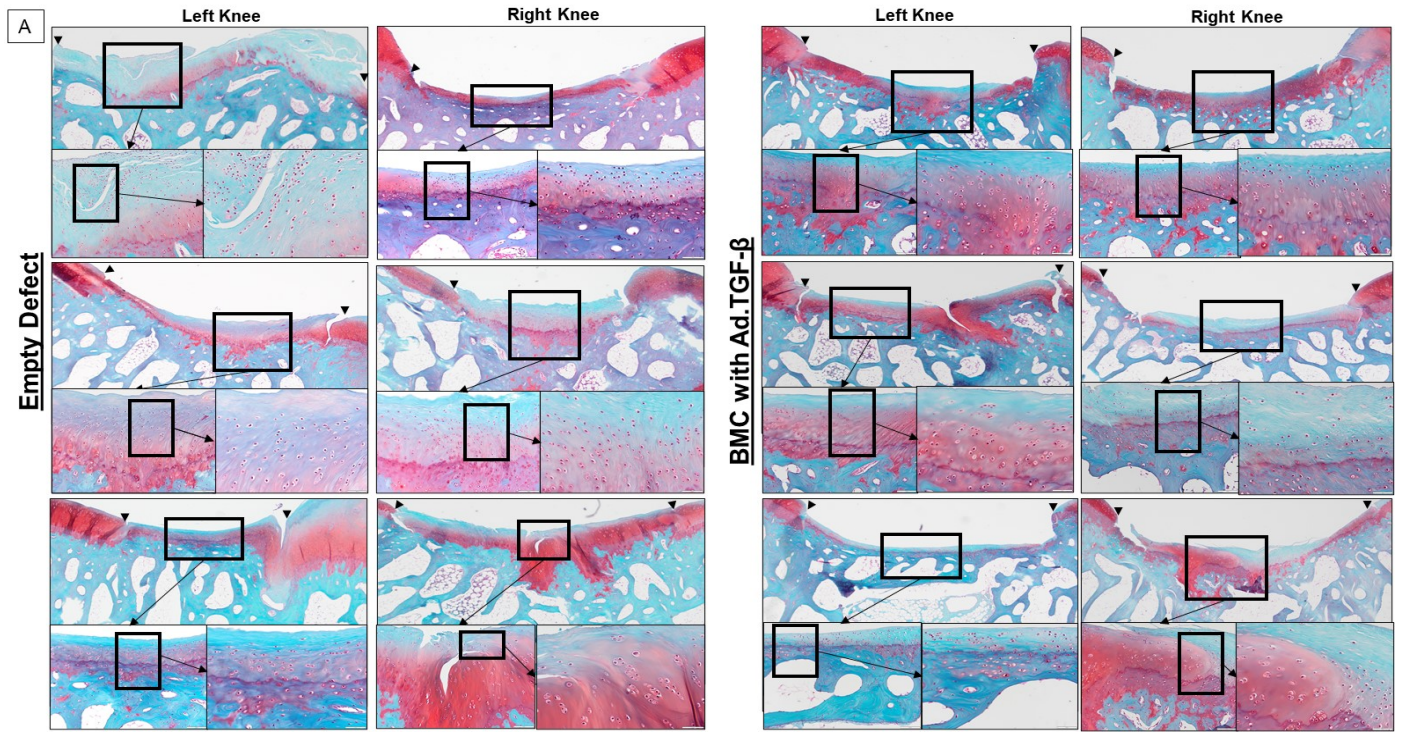

606

607

608

609

610

611

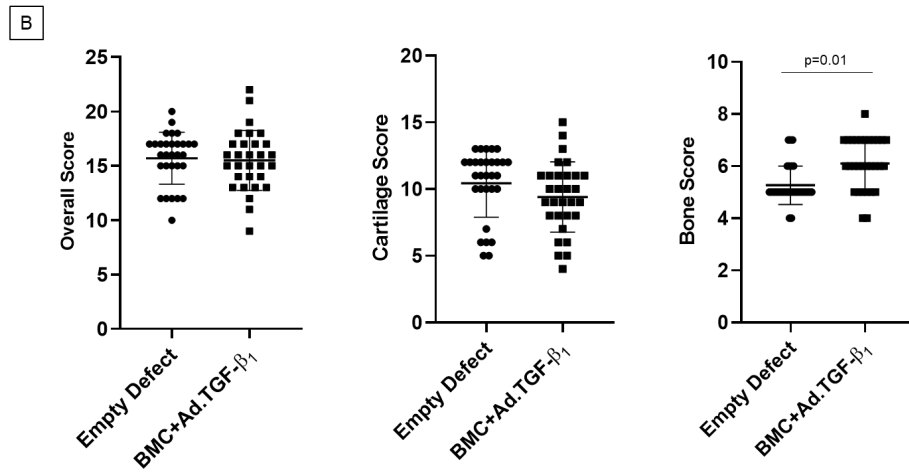

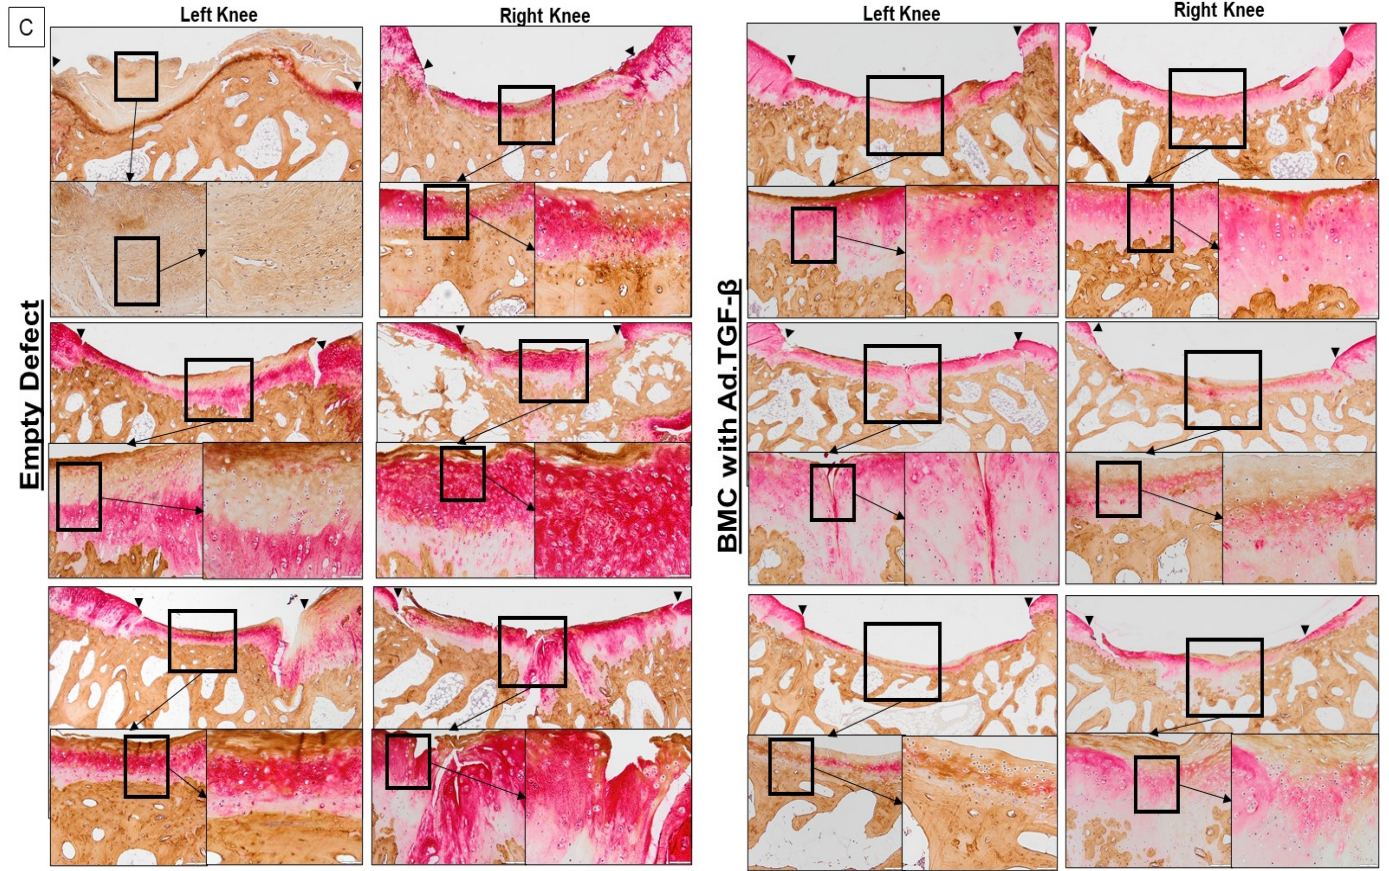

612  
613  
614  
615  
616  
617  
618  
619  
620  
621  
622  
623  
624  
625  
626  
627  
628  
629  
630  
631  
632  
633  
634  
635  
636  
637

638  
639  
640

**Figure 5**

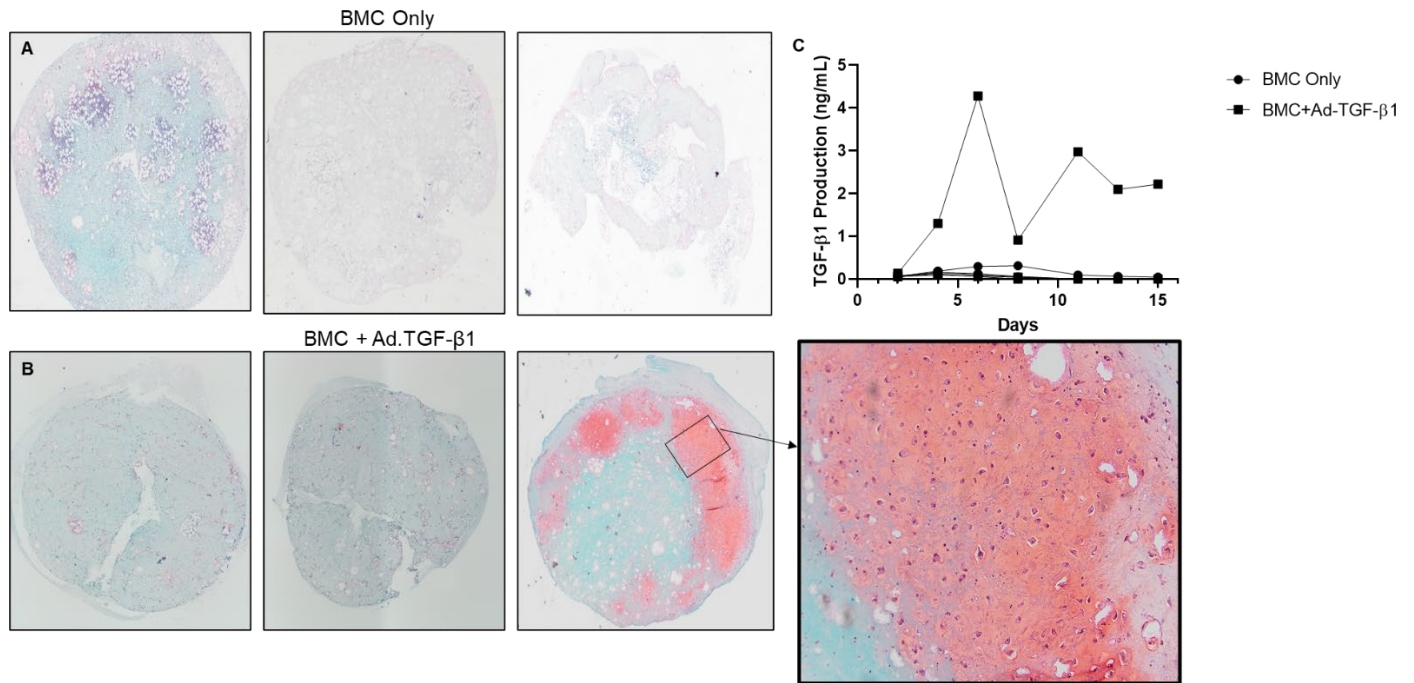

641  
642  
643  
644  
645  
646  
647  
648  
649  
650  
651  
652  
653  
654  
655  
656  
657  
658  
659  
660  
661  
662  
663  
664  
665  
666  
667  
668



669 **Figure 6**  
670

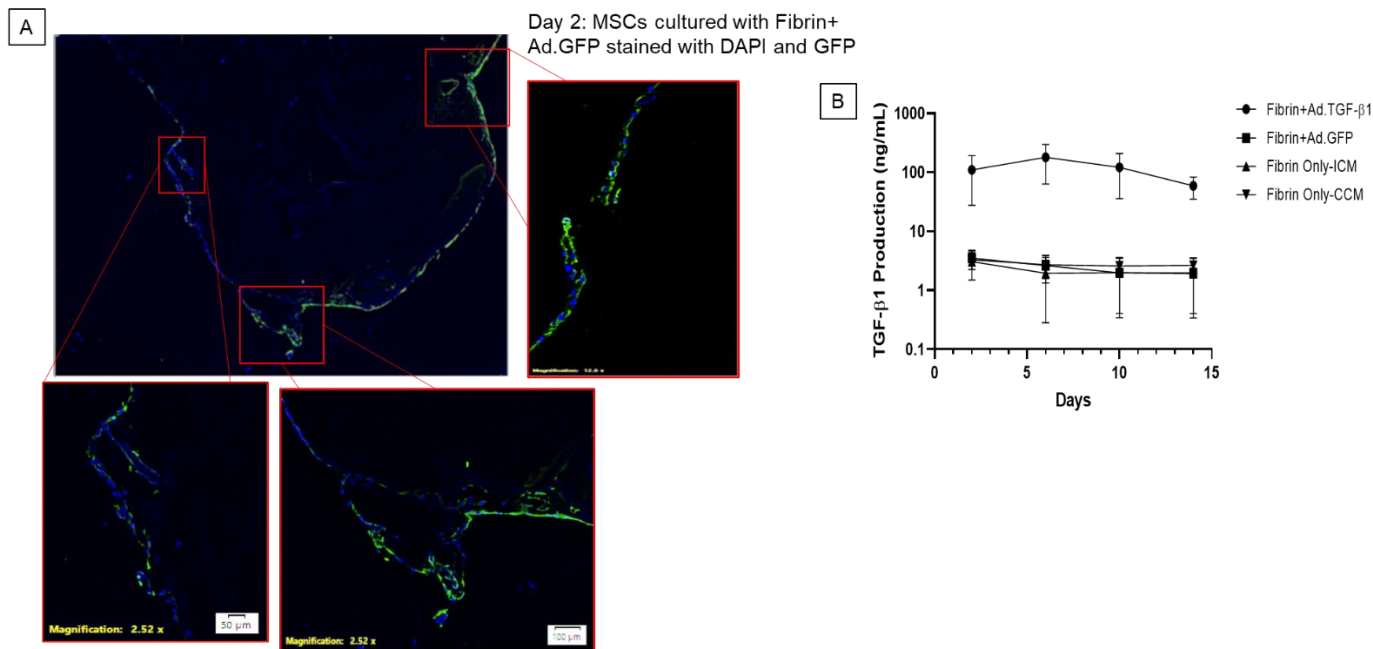

671  
672  
673  
674  
675  
676  
677  
678  
679  
680  
681  
682  
683  
684  
685  
686  
687  
688  
689  
690  
691  
692  
693  
694  
695  
696  
697  
698  
699  
700

701 **Figure 7**

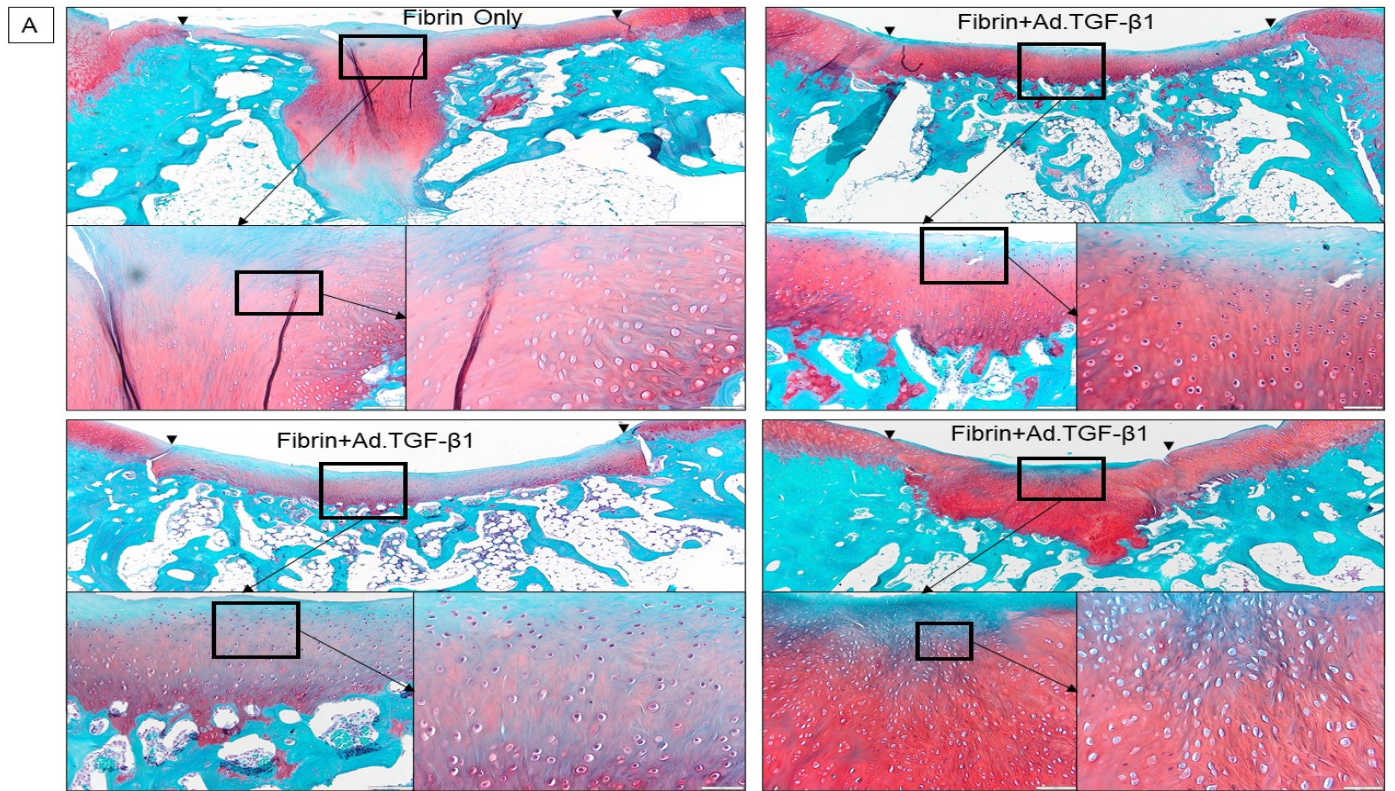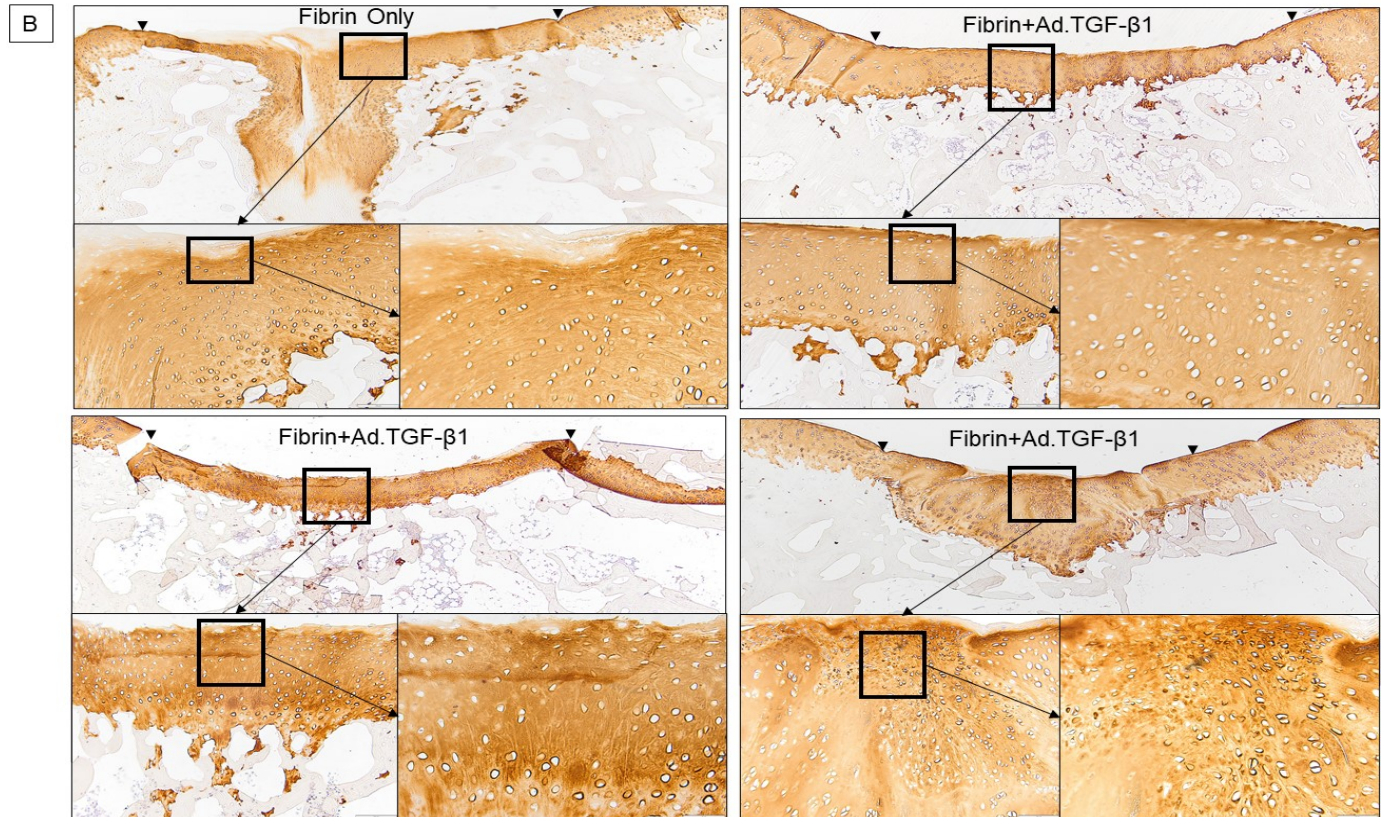

Source: https://www.biorxiv.org/content/10.1101/2021.09.22.461300v1.full.pdf
